# Supplementary material for: Discrete unusual mixed-bridged trinuclear CoIII2CoII and pentanuclear NiII coordination complexes supported by a phenolate-based ligand: theoretical and experimental magneto-structural study
Source: Royal Society of Chemistry journal article supplement (doi:10.1039/d1nj00228g), 2021-01-01
Supplement: d1nj00228g1.pdf [file d1nj00228g1.pdf]

## Electronic Supporting Information

### Discrete unusual mixed-bridged trinuclear $\text{Co}^{\text{III}}_2\text{Co}^{\text{II}}$ and pentanuclear $\text{Ni}^{\text{II}}$ coordination complexes supported by phenolate-based ligand: theoretical and experimental magneto-structural study

Richa<sup>a,#</sup>, Muni Rathnam<sup>b,#</sup>, Akhilesh Kumar<sup>c,g</sup>, Indresh Verma<sup>c</sup>, Julia Klak<sup>\*d</sup>, Joan Cano<sup>e</sup>, Antonio J. Mota<sup>\*f</sup>, Amit Rajput<sup>\*a</sup> and Himanshu Arora<sup>\*a</sup>

---

<sup>a</sup>School of Engineering and Sciences, G.D. Goenka University, Gurugram, India. E-mail: himanshuiitk2004@gmail.com, +91 8860185079.

<sup>b</sup>Department of Chemical Sciences, Indian Institute of Science Education and Research Kolkata, Mohanpur 741 246, India.

<sup>c</sup>Department of Chemistry, Indian Institute of Technology Kanpur, Kanpur 208 016, India

<sup>d</sup>Faculty of Chemistry, University of Wrocław, Wrocław 50-383, Poland.

<sup>e</sup>Department of Química Inorgànica/Instituto de Ciencia Molecular (ICMol), Facultat de Química de la Universitat de València, C/Catedrático Jose Beltrán 2, 46980 Paterna, València, Spain.

<sup>f</sup>Department of Inorganic Chemistry, Faculty of Science, University of Granada, 18071, Granada, Spain. E-mail: mota@ugr.es

<sup>g</sup>Department of Chemistry, Axis Institute of Technology & Management Kanpur, Kanpur, India

---

<sup>#</sup>Both the authors have equal contribution.

1. UV-Vis of **1-2** in  $\text{CH}_3\text{CN}$  Fig. S1-S2
2. Field dependence of the magnetization ( $M$  per  $\text{Co}^{\text{III}}_2\text{Co}^{\text{II}}$  entities) for **1** Fig. S3
3. Field dependence of the magnetization ( $M$  per  $\text{Ni}_5$  entities) for **2** Fig. S4
4. Additional discussion of magnetic studies of complex **1**.
5. Calculated magnetization at different temperatures for  $\text{Co}_3$  in complex **1** Fig. S5
6. Orientation of  $D_{zz}$ ,  $D_{xx}$  and  $D_{yy}$  for  $\text{Co}_3$  in complex **1** Fig. S6
7. View of the calculated complexes **1AF** (up, left), **1F** (up, right) and **1Fwa** (bottom), in order to reveal the influence of the AF and F moieties, and the acetate bridges on the global magnetic behavior of the complex. Fig. S7
8. Addition discussion of theoretical studies of complex **2**.

---

|                                                                                            |          |
|--------------------------------------------------------------------------------------------|----------|
| 9. Selected bond lengths [ $\text{\AA}$ ] and angles [ $^\circ$ ] of <b>1</b> and <b>2</b> | Table S1 |
| 10. Bond Valence Calculation Table of complex <b>1</b>                                     | Table S2 |
| 11. Calculated spin densities of the magnetic centers of complex <b>2</b>                  | Table S3 |

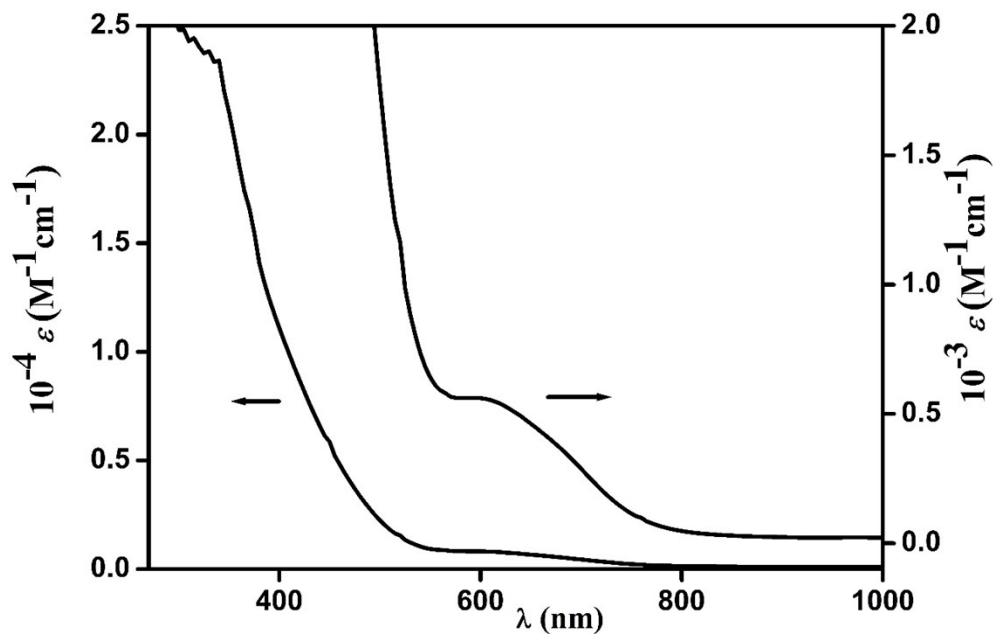

Fig. S1. Absorption spectra of  $[\text{Co}^{\text{II/III}}_3(\mu\text{-OL})_2(\mu\text{-OOCCH}_3)_2(\mu\text{-N}_3)_2(\text{N}_3)_2]$  (**1**) in  $\text{CH}_3\text{CN}$ .

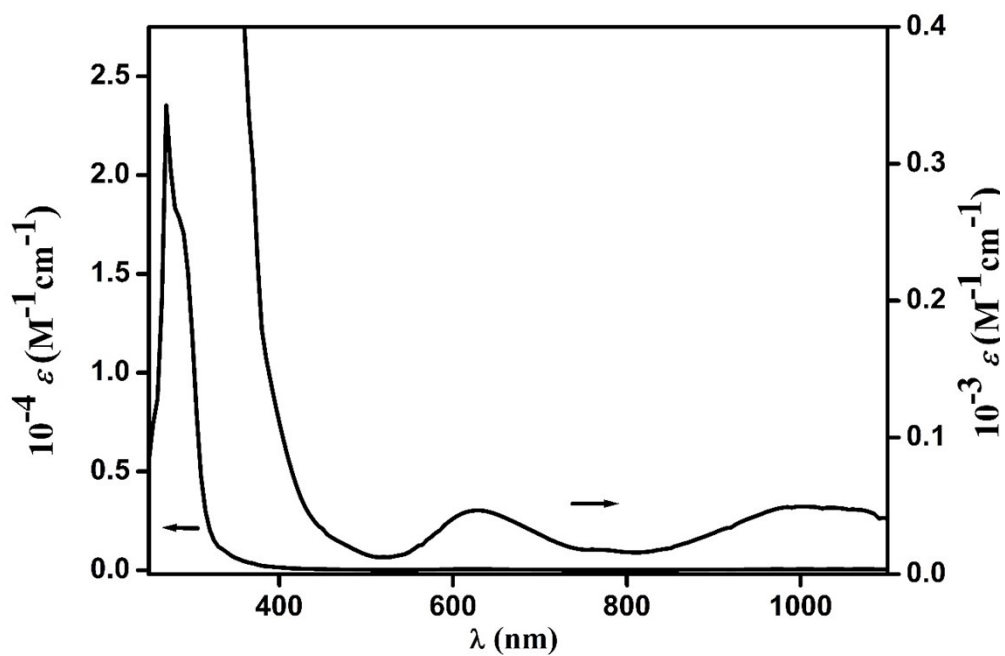

Fig. S2. Absorption spectra of  $[\text{Ni}^{\text{II}}_5(\mu\text{-OL})_4(\mu\text{-OOCCH}_3)_2(\text{OOCCH}_3)_2(\mu\text{-N}_3)_2]$  (**2**) in  $\text{CH}_3\text{CN}$ .

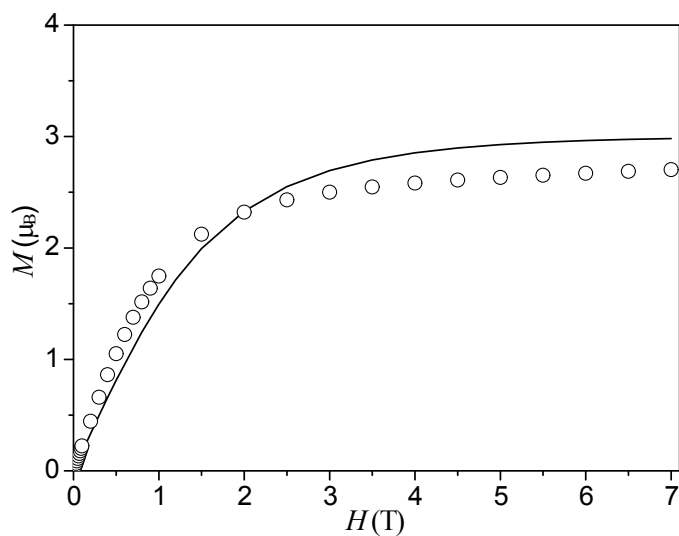

Fig. S3. Field dependence of the magnetization ( $M$  per  $\text{Co}^{\text{III}}_2\text{Co}^{\text{II}}$  entities) for **1**. The solid line is the Brillouin function curve for the system of one uncoupled spin with  $S = 3/2$  and  $g = 2.0$  in the absence of zero-field splitting.

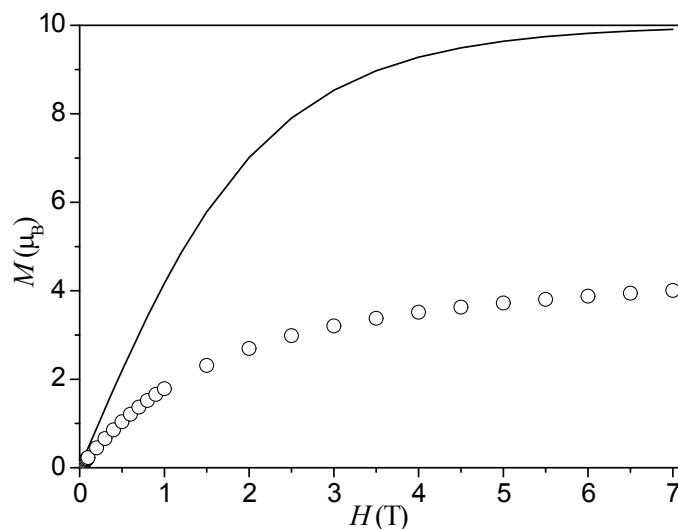

Fig. S4. Field dependence of the magnetization ( $M$  per  $\text{Ni}_5$  entities) for **2**. The solid line is the Brillouin function curve for the system of five uncoupled spins with  $S = 1$  and  $g = 2.0$  in the absence of zero-field splitting.

Additional discussion of magnetic studies of complex **1**. The magnetic susceptibility for a magnetically isolated cobalt(II) derived through Hamiltonian is shown in eq (2-5):<sup>4</sup>

$$\chi_m = \frac{\chi_{\parallel} + 2\chi_{\perp}}{3} \quad (2)$$

$$\chi_{\parallel} = \frac{N\beta^2 g_{\parallel}^2}{4kT} \cdot \frac{1 + 9\exp\left(-\frac{2D}{kT}\right)}{1 + \exp\left(-\frac{2D}{kT}\right)} \quad (3)$$

$$\chi_{\perp} = \frac{N\beta^2 g_{\perp}^2}{4kT} \cdot \frac{4 + 3\frac{kT}{D} \left[1 - \exp\left(-\frac{2D}{kT}\right)\right]}{1 + \exp\left(-\frac{2D}{kT}\right)} \quad (4)$$

Taking to account the possibility of presence of weak intermolecular magnetic exchange, the eq. 2 must be modified by including a molecular field correction term ( $zJ'$ ).<sup>4</sup> This yields the equation (eq.5):

$$\chi_m^{corr} = \frac{\chi_m}{1 - \frac{2zJ'}{N\beta^2 g^2} \cdot \chi_m} \quad (5)$$

In the fitting process, we have neglected the rhombic components of the zero-field splitting and considered  $g_{\parallel} = g_{\perp} = g$  (average Landé factor) in order to avoid overparameterization.

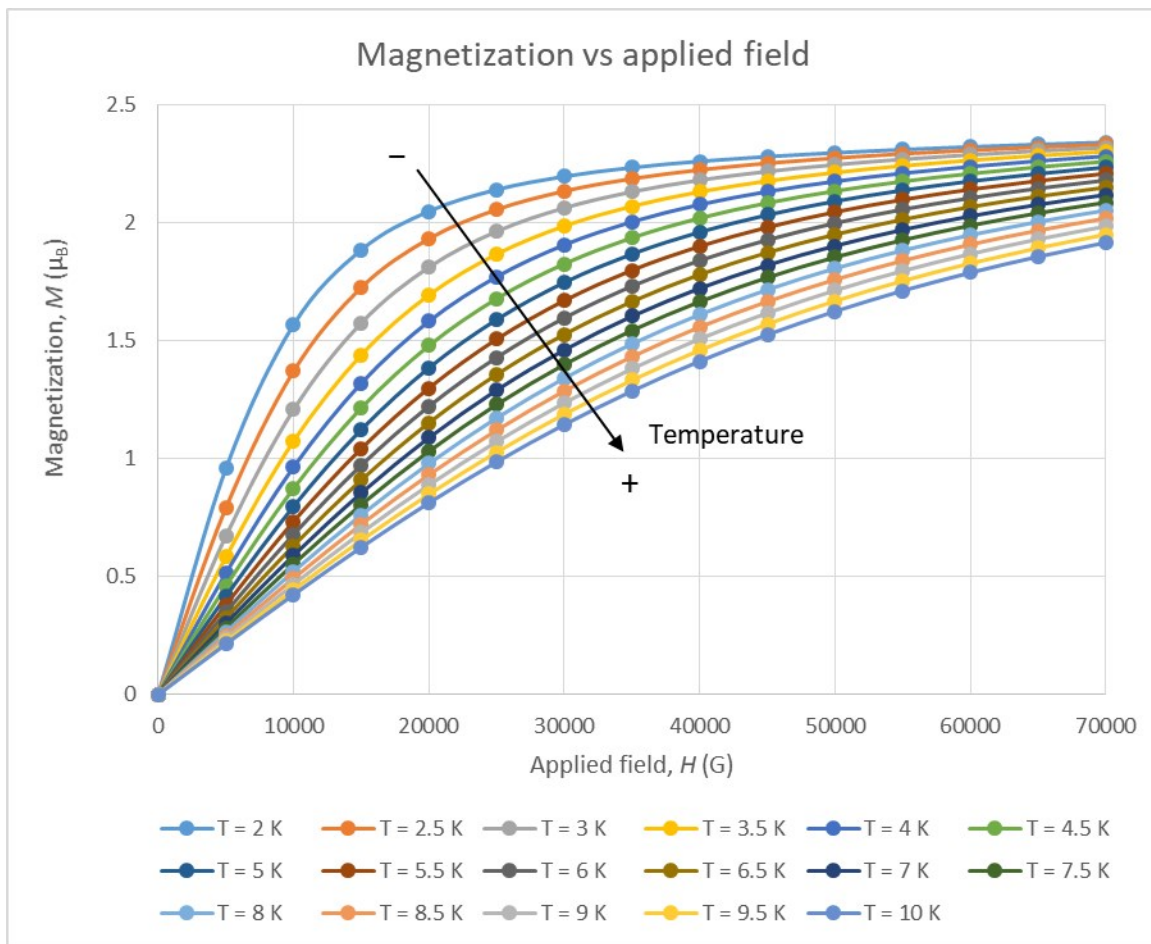

Fig. S5. Theoretical simulation of the magnetization in function of the applied field and the temperature for Co3 in complex **1**.

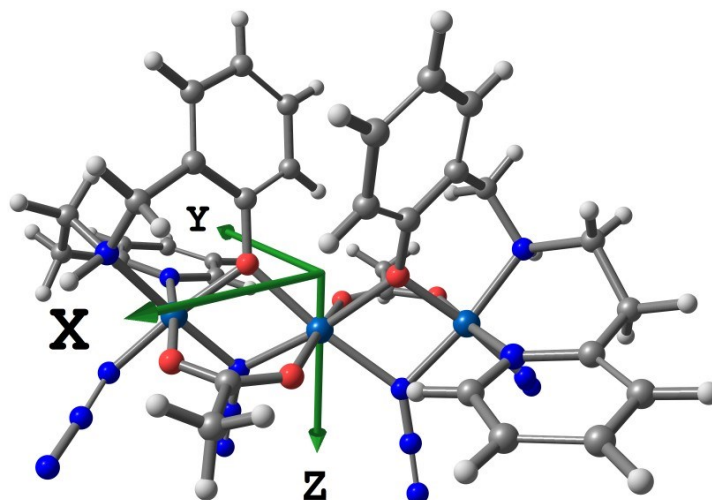

Fig. S6. Representation of the calculated orientation for the components  $D_{zz}$ ,  $D_{xx}$  and  $D_{yy}$  (appearing as Z, X and Y, respectively) to the magnetic anisotropy for Co3 in complex **1**.

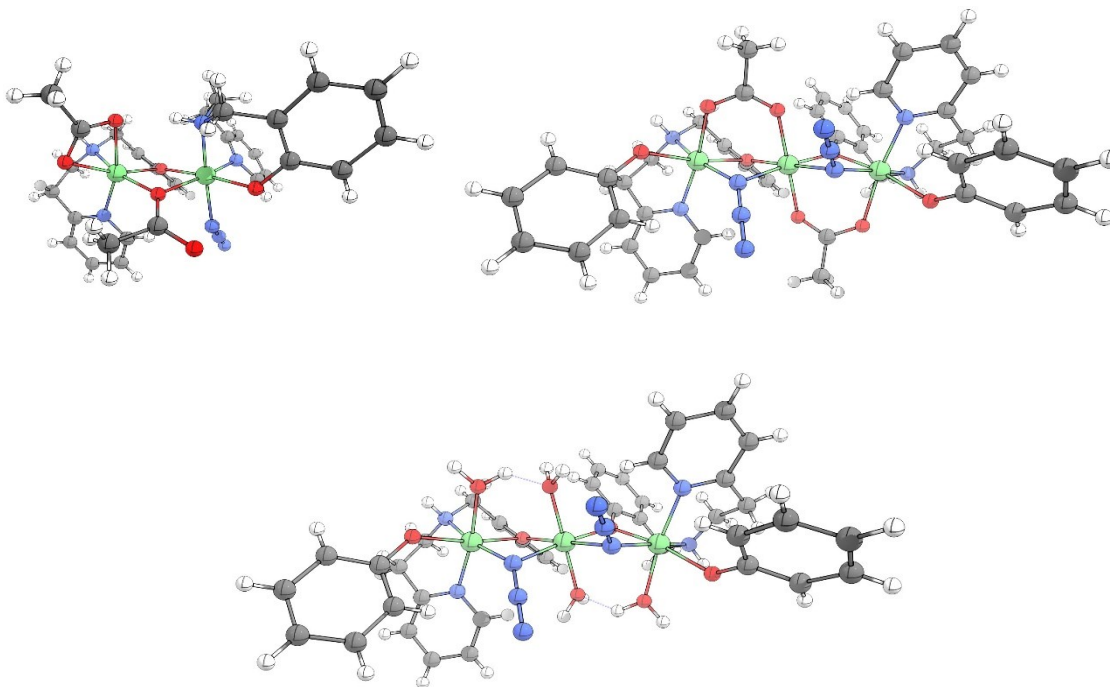

Fig. S7. View of the calculated complexes **1AF** (up, left), **1F** (up, right) and **1Fwa** (bottom), in order to reveal the influence of the AF and F moieties, and the acetate bridges on the global magnetic behavior of the complex.

One could expect that, besides the Ni-Ni bridges, the ferromagnetic part of the complex (Ni2-Ni3-Ni4 moieties) could modulate the coupling constant of the AF part (Ni1-Ni2 and Ni4-Ni5 moieties) and vice versa. In order to know the extent of this mutual effect, we have calculated the magnetic coupling constants for several new complexes: one, **1AF**, the AF part where only operates a unique magnetic pathway defined by  $J_1$ , formed by Ni1 and Ni2 centers by keeping all their ligands as found in the crystal structure, and other, **1F**, the ferromagnetic part where two magnetic pathways namely,  $J_2$  and  $J_4$  are operative, formed by Ni2, Ni3 and Ni4 centers keeping all their ligands as found in the crystal structure except the phenoxy moiety that we cut to strictly have a phenoxo ligand. See Fig. S7 and the related text in the SI for more information about the effect of these changes. For the former (**1AF**) we get a new  $J_1$  magnetic coupling constant of  $-21.1 \text{ cm}^{-1}$ , very similar to that of the title compound, see Table 4. For the later (**1F**) we get new values of the corresponding magnetic coupling constants of  $+25.8$  and  $-0.6 \text{ cm}^{-1}$ , respectively for  $J_2$  and  $J_4$ . These values therefore demonstrate that both parts of the pentanuclear complex (the AF and F coupled) are almost independent from a magnetic point of view and that both behave as two independent complexes with little influence on each other.

Furthermore, in order to understand the importance of the *syn-syn* bridging acetato ligands in the magnetic behavior of the ferromagnetic part of the complex, we recalculate complex **1F** by replacing the acetate ligands by water molecules, **1Fwa** in Fig. S7, keeping the oxygen positions and adding the needed hydrogen atoms. This operation resulted in new magnetic coupling constants values of  $+19.5$  and  $-4.3 \text{ cm}^{-1}$ , respectively for  $J_2$  and  $J_4$  (to compare with  $+25.8$  and  $-0.6 \text{ cm}^{-1}$ , respectively), thus revealing the ferromagnetic contribution of the acetate bridge for both ( $J_2$  and  $J_4$ ) magnetic pathways.

Table S1. Selected bond lengths [ $\text{\AA}$ ] and angles [ $^\circ$ ] of  $[\text{Co}^{\text{III}}_2\text{Co}^{\text{II}}(\mu\text{-OL})_2(\mu\text{-OOCCH}_3)_2(\mu\text{-N}_3)_2(\text{N}_3)_2]\cdot\text{Et}_2\text{O}$  (**1**) and  $[\text{Ni}^{\text{II}}_5(\mu\text{-OL})_4(\mu\text{-OOCCH}_3)_2(\text{OOCCH}_3)_2(\mu\text{-N}_3)_2]\cdot\text{CH}_3\text{CN}$  (**2**).

| $[\text{Co}^{\text{III}}_2\text{Co}^{\text{II}}(\mu\text{-OL})_2(\mu\text{-OOCCH}_3)_2(\mu\text{-N}_3)_2(\text{N}_3)_2]\cdot\text{Et}_2\text{O}$ ( <b>1</b> ) |            |               |            |
|---------------------------------------------------------------------------------------------------------------------------------------------------------------|------------|---------------|------------|
| C1–O1                                                                                                                                                         | 1.347(5)   | C17–O4        | 1.354(5)   |
| C15–O2                                                                                                                                                        | 1.244(6)   | C15–O3        | 1.260(6)   |
| C31–O5                                                                                                                                                        | 1.230(7)   | C31–O6        | 1.277(6)   |
| O1–Co1–O1#                                                                                                                                                    | 180.00(16) | O2–Co1–O2#    | 180.0(1)   |
| O2–Co1–O1                                                                                                                                                     | 86.81(12)  | O2–Co1–O1#    | 93.19(12)  |
| O1–Co1–N3                                                                                                                                                     | 74.33(13)  | O1–Co1–N3#    | 105.67(13) |
| O2–Co1–N3                                                                                                                                                     | 87.01(13)  | O2–Co1–N3#    | 92.99(13)  |
| N3–Co1–N3#                                                                                                                                                    | 180.0(2)   | O4–Co3–N11    | 73.15(15)  |
| O4–Co3–O4\$                                                                                                                                                   | 98.88(16)  | O4–Co3–O5     | 88.31(14)  |
| O4–Co3–N11\$                                                                                                                                                  | 171.86(15) | O5–Co3–O5\$   | 174.9(2)   |
| O4–Co3–O5\$                                                                                                                                                   | 95.04(13)  | O5–Co3–N11\$  | 90.70(17)  |
| O5–Co3–N11                                                                                                                                                    | 86.53(16)  | N11–Co3–N11\$ | 114.9(3)   |
| O1–Co2–O3                                                                                                                                                     | 92.43(13)  | O1–Co2–N1     | 90.74(14)  |
| O1–Co2–N2                                                                                                                                                     | 93.66(15)  | O1–Co2–N3     | 81.82(15)  |
| O1–Co2–N6                                                                                                                                                     | 174.28(18) | O3–Co2–N1     | 175.95(17) |
| O3–Co2–N3                                                                                                                                                     | 88.67(15)  | O3–Co2–N2     | 83.77(16)  |
| O3–Co2–N6                                                                                                                                                     | 88.08(17)  | N1–Co2–N2     | 93.52(17)  |
| N1–Co2–N3                                                                                                                                                     | 94.28(17)  | N2–Co2–N3     | 171.03(17) |
| N1–Co2–N6                                                                                                                                                     | 89.02(17)  | N2–Co2–N6     | 92.1(2)    |
| N3–Co2–N6                                                                                                                                                     | 92.50(18)  | N9–Co4–N10    | 92.64(18)  |
| O4–Co4–O6                                                                                                                                                     | 91.42(14)  | O4–Co4–N9     | 91.60(15)  |
| O4–Co4–N10                                                                                                                                                    | 93.54(15)  | O4–Co4–N11    | 81.30(16)  |
| O4–Co4–N14                                                                                                                                                    | 173.0(2)   | O6–Co4–N9     | 175.33(18) |
| O6–Co4–N10                                                                                                                                                    | 83.62(17)  | O6–Co4–N11    | 90.73(17)  |
| O6–Co4–N14                                                                                                                                                    | 89.81(17)  | N9–Co4–N11    | 93.25(18)  |
| N10–Co4–N11                                                                                                                                                   | 172.27(18) | N9–Co4–N14    | 87.63(18)  |



|                                       |          |             |          |
|---------------------------------------|----------|-------------|----------|
| N10–Co4–N14                           | 93.5(2)  | N11–Co4–N14 | 91.8(3)  |
| C1–O1–Co1                             | 134.5(3) | C1–O1–Co2   | 123.9(3) |
| C17–O4–Co3                            | 134.4(3) | C17–O4–Co4  | 122.8(3) |
| C15–O2–Co1                            | 127.9(3) | C15–O3–Co2  | 130.0(3) |
| C31–O5–Co3                            | 128.2(4) | C31–O6–Co4  | 127.6(4) |
| N4–N3–Co1                             | 136.8(4) | N4–N3–Co2   | 124.7(4) |
| N7–N6–Co2                             | 120.6(4) | N12–N11–Co3 | 135.3(5) |
| N12–N11–Co4                           | 126.2(5) |             |          |
| # [1–x, 1–y, 1–z], \$ [1–x, y, 1.5–z] |          |             |          |

| [Ni <sup>II</sup> <sub>5</sub> (μ-OL) <sub>4</sub> (μ-OOCCH <sub>3</sub> ) <sub>2</sub> (OOCCH <sub>3</sub> ) <sub>2</sub> (μ-N <sub>3</sub> ) <sub>2</sub> ]·CH <sub>3</sub> CN ( <b>2</b> ) |            |            |           |
|-----------------------------------------------------------------------------------------------------------------------------------------------------------------------------------------------|------------|------------|-----------|
| C1–O1                                                                                                                                                                                         | 1.329(3)   | C15–O4     | 1.345(3)  |
| C29–O2                                                                                                                                                                                        | 1.249(3)   | C29–O3     | 1.284(3)  |
| C31–O5                                                                                                                                                                                        | 1.268(3)   | C31–O6     | 1.265(3)  |
| O1–Ni1–O1#                                                                                                                                                                                    | 105.00(9)  | O1–Ni1–O2  | 87.70(6)  |
| O1–Ni1–N3                                                                                                                                                                                     | 172.97(7)  | O1–Ni1–O2# | 94.47(6)  |
| O1–Ni1–N3#                                                                                                                                                                                    | 81.44(7)   | O2–Ni1–N3# | 88.56(7)  |
| O2–Ni1–O2#                                                                                                                                                                                    | 176.43(9)  | O2–Ni1–N3  | 88.97(7)  |
| N3–Ni1–N3#                                                                                                                                                                                    | 92.29(10)  | N2–Ni2–N3# | 169.30(7) |
| O1–Ni2–O3                                                                                                                                                                                     | 93.72(6)   | O1–Ni2–O4  | 169.66(6) |
| O3–Ni2–O4                                                                                                                                                                                     | 75.96(6)   | O1–Ni2–N1  | 95.58(7)  |
| O1–Ni2–N2                                                                                                                                                                                     | 90.18(7)   | O1–Ni2–N3  | 80.75(7)  |
| O4–Ni2–N1                                                                                                                                                                                     | 94.73(7)   | O4–Ni2–N2  | 90.60(7)  |
| O4–Ni2–N3#                                                                                                                                                                                    | 97.31(7)   | N1–Ni2–O3  | 170.64(7) |
| N2–Ni2–O3                                                                                                                                                                                     | 90.59(7)   | N3–Ni2–O3# | 84.39(7)  |
| N1–Ni2–N2                                                                                                                                                                                     | 90.46(7)   | N1–Ni2–N3# | 96.04(7)  |
| N4–N3–Ni1                                                                                                                                                                                     | 116.13(15) | O3–Ni3–O4  | 78.19(6)  |
| O3–Ni3–O5                                                                                                                                                                                     | 88.82(6)   | O4–Ni3–O5  | 99.39(6)  |
| O4–Ni3–O6                                                                                                                                                                                     | 160.42(7)  | O3–Ni3–O6  | 95.93(6)  |

|                   |            |            |            |
|-------------------|------------|------------|------------|
| O5–Ni3–O6         | 61.56(6)   | O3–Ni3–N6  | 97.15(7)   |
| O3–Ni3–N7         | 167.83(7)  | O4–Ni3–N6  | 96.43(7)   |
| O4–Ni3–N7         | 92.42(7)   | O5–Ni3–N6  | 163.94(7)  |
| O5–Ni3–N7         | 85.06(7)   | O6–Ni3–N6  | 102.85(7)  |
| O6–Ni3–N7         | 90.40(7)   | N6–Ni3–N7  | 91.54(8)   |
| N4–N3–Ni2#        | 134.19(16) | Ni1–O1–C1  | 135.02(14) |
| Ni2–O1–C1         | 123.76(13) | Ni2–O4–C15 | 132.91(14) |
| Ni3–O4–C15        | 120.76(14) | Ni2–O3–C29 | 125.68(15) |
| Ni3–O3–C29        | 131.37(15) | Ni1–O2–C29 | 130.58(15) |
| Ni3–O5–C31        | 87.87(14)  | Ni3–O6–C31 | 90.65(15)  |
| # [1.5–x, y, 1–z] |            |            |            |

Table S2. Bond Valence Calculation of **1**

|         | Trans Conformation |                |                       | $S_{ij} = \exp\{(R_0-R)/B\}$ |
|---------|--------------------|----------------|-----------------------|------------------------------|
|         | R                  | R <sub>0</sub> | (R <sub>0</sub> -R)/B |                              |
| Co1–O1  | 2.054(3)           | 1.685          | -0.997                | 0.37                         |
| Co1–N3  | 2.137(5)           | 1.72           | -1.127                | 0.32                         |
| Co1–O2  | 2.049(4)           | 1.685          | -0.983                | 0.37                         |
| Co1–O1  | 2.054(3)           | 1.685          | -0.997                | 0.37                         |
| Co1–N3  | 2.137(5)           | 1.72           | -1.127                | 0.32                         |
| Co1–O2  | 2.049(4)           | 1.685          | -0.983                | 0.37                         |
|         |                    |                | <i>V</i>              | 2.12                         |
| Co2–O1  | 1.914(4)           | 1.637          | -0.749                | 0.47                         |
| Co2–N1  | 1.953(5)           | 1.69           | -0.711                | 0.49                         |
| Co2–N2  | 1.961(5)           | 1.69           | -0.732                | 0.48                         |
| Co2–O3  | 1.911(3)           | 1.637          | -0.740                | 0.48                         |
| Co2–N3  | 1.953(5)           | 1.69           | -0.711                | 0.49                         |
| Co2–N6  | 1.928(5)           | 1.69           | -0.643                | 0.53                         |
|         |                    |                | <i>V</i>              | 2.94                         |
|         | Cis Conformation   |                |                       |                              |
| Co3–O4  | 2.058(4)           | 1.685          | -1.01                 | 0.36                         |
| Co3–N11 | 2.137(5)           | 1.72           | -1.127                | 0.32                         |

|         |          |       |          |      |
|---------|----------|-------|----------|------|
| Co3–O5  | 2.035(4) | 1.685 | -0.946   | 0.39 |
| Co3–O4  | 2.058(4) | 1.685 | -1.01    | 0.36 |
| Co3–N11 | 2.137(5) | 1.72  | -1.127   | 0.32 |
| Co3–O5  | 2.035(4) | 1.685 | -0.946   | 0.39 |
|         |          |       | <i>V</i> | 2.14 |
|         |          |       |          |      |
| Co4–O4  | 1.902(3) | 1.637 | -0.716   | 0.49 |
| Co4–N9  | 1.965(4) | 1.69  | -0.743   | 0.47 |
| Co4–N11 | 1.937(5) | 1.69  | -0.667   | 0.51 |
| Co4–O6  | 1.945(3) | 1.637 | -0.832   | 0.43 |
| Co4–N10 | 1.961(5) | 1.69  | -0.732   | 0.48 |
| Co4–N14 | 1.914(5) | 1.69  | -0.605   | 0.55 |
|         |          |       | <i>V</i> | 2.93 |

Table S3. Calculated spin densities of the magnetic centers (as shown in Table 4) for all the calculated states. Darker backgrounds in cells represent the spin down centers in each case.

| State<br>(Multiplicity) | Ni1     | Ni2     | Ni3     | Ni4     | Ni5     |
|-------------------------|---------|---------|---------|---------|---------|
| <b>11</b>               | +1.6637 | +1.6570 | +1.6690 | +1.6570 | +1.6637 |
| <b>7<sup>a</sup></b>    | -1.6601 | +1.6554 | +1.6691 | +1.6569 | +1.6637 |
| <b>7b</b>               | +1.6595 | -1.6588 | +1.6732 | +1.6569 | +1.6637 |
| <b>7c</b>               | +1.6643 | +1.6605 | -1.6778 | +1.6605 | +1.6643 |
| <b>3<sup>a</sup></b>    | -1.6643 | -1.6604 | +1.6734 | +1.6569 | +1.6637 |
| <b>3b</b>               | -1.6595 | +1.6589 | -1.6776 | +1.6605 | +1.6643 |
| <b>3c</b>               | -1.6601 | +1.6554 | +1.6734 | -1.6588 | +1.6595 |
| <b>3d</b>               | -1.6601 | +1.6554 | +1.6693 | +1.6554 | -1.6601 |
| <b>3e</b>               | +1.6601 | -1.6553 | -1.6736 | +1.6604 | +1.6643 |
| <b>3f</b>               | +1.6595 | -1.6589 | +1.6775 | -1.6589 | +1.6595 |
